# Supplementary material for: Comparative transcriptomics of a monocotyledonous geophyte reveals shared molecular mechanisms of underground storage organ formation
Source: bioRxiv or medRxiv preprint supplement (doi:10.1101/845602), 2020-09-20
Supplement: Supplementary file [file media-1.pdf]

The following Supporting Information is available for this article:

**Fig. S1** Replication information for the three biological replicates of rhizome meristem (RHI)

tissue, showing A) the sum of fragments for each replicate, B) 1:1 scatterplots of transcript

abundance for all pairwise comparisons of the replicates, C) MA plots (Bland Altman plot) for all

pairwise comparisons of the replicates, and D) the correlation coefficients between all

replicates.

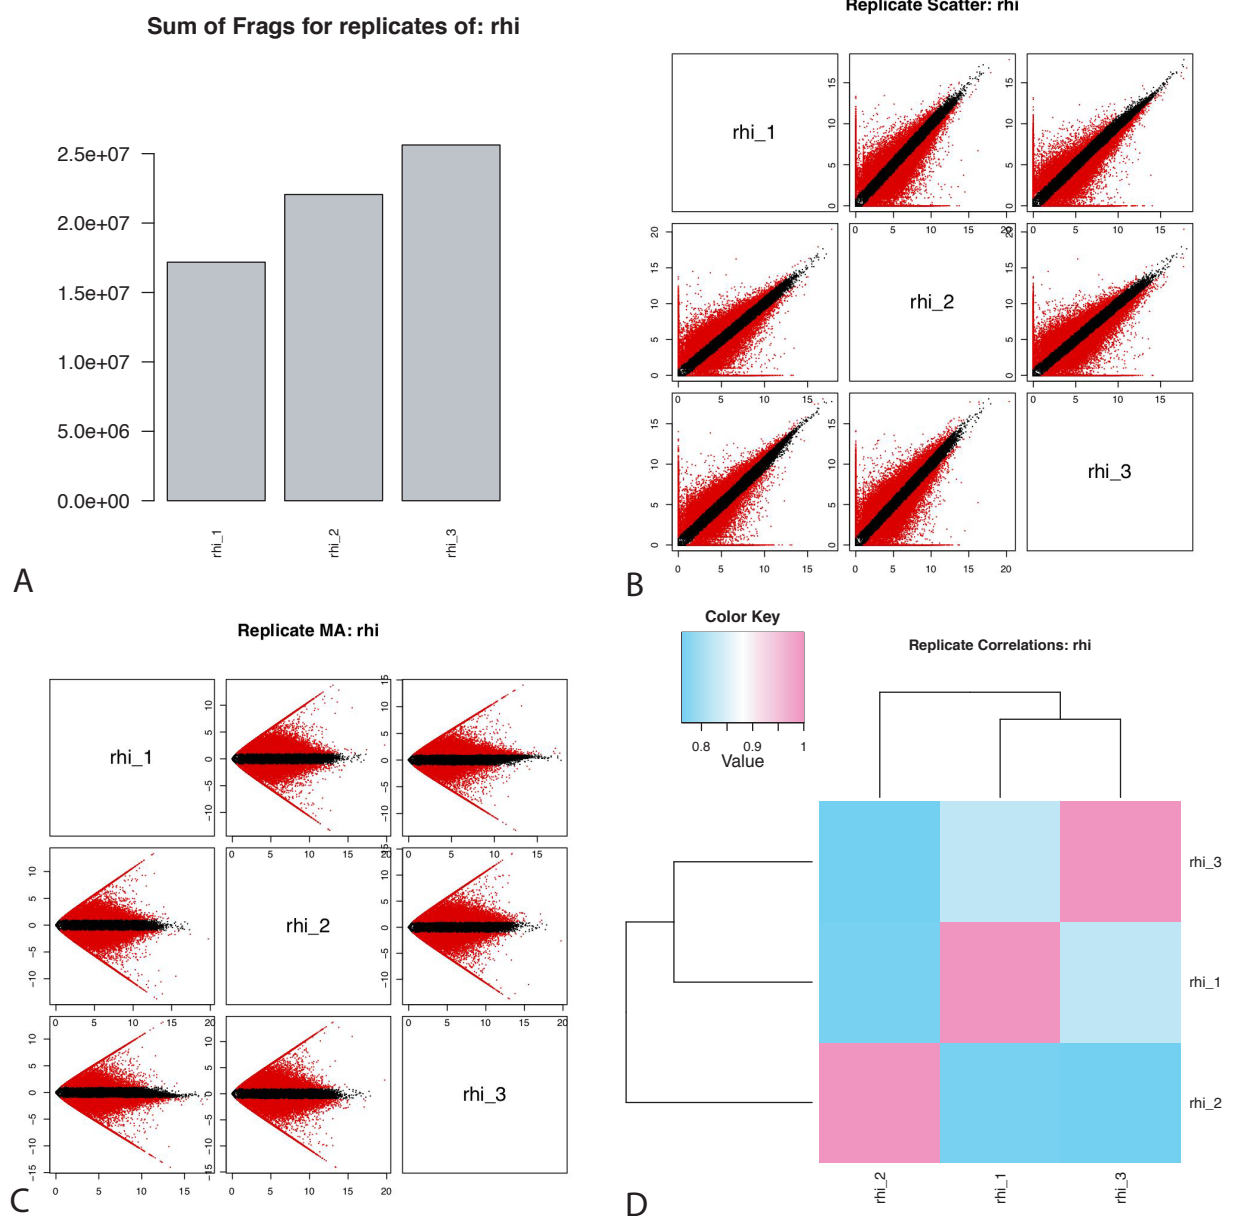

**Fig. S2** Replication information for the three biological replicates of root apical meristem (ROO) tissue, showing A) the sum of fragments for each replicate, B) 1:1 scatterplots of transcript abundance for all pairwise comparisons of the replicates, C) MA plots (Bland Altman plot) for all pairwise comparisons of the replicates, and D) the correlation coefficients between all replicates.

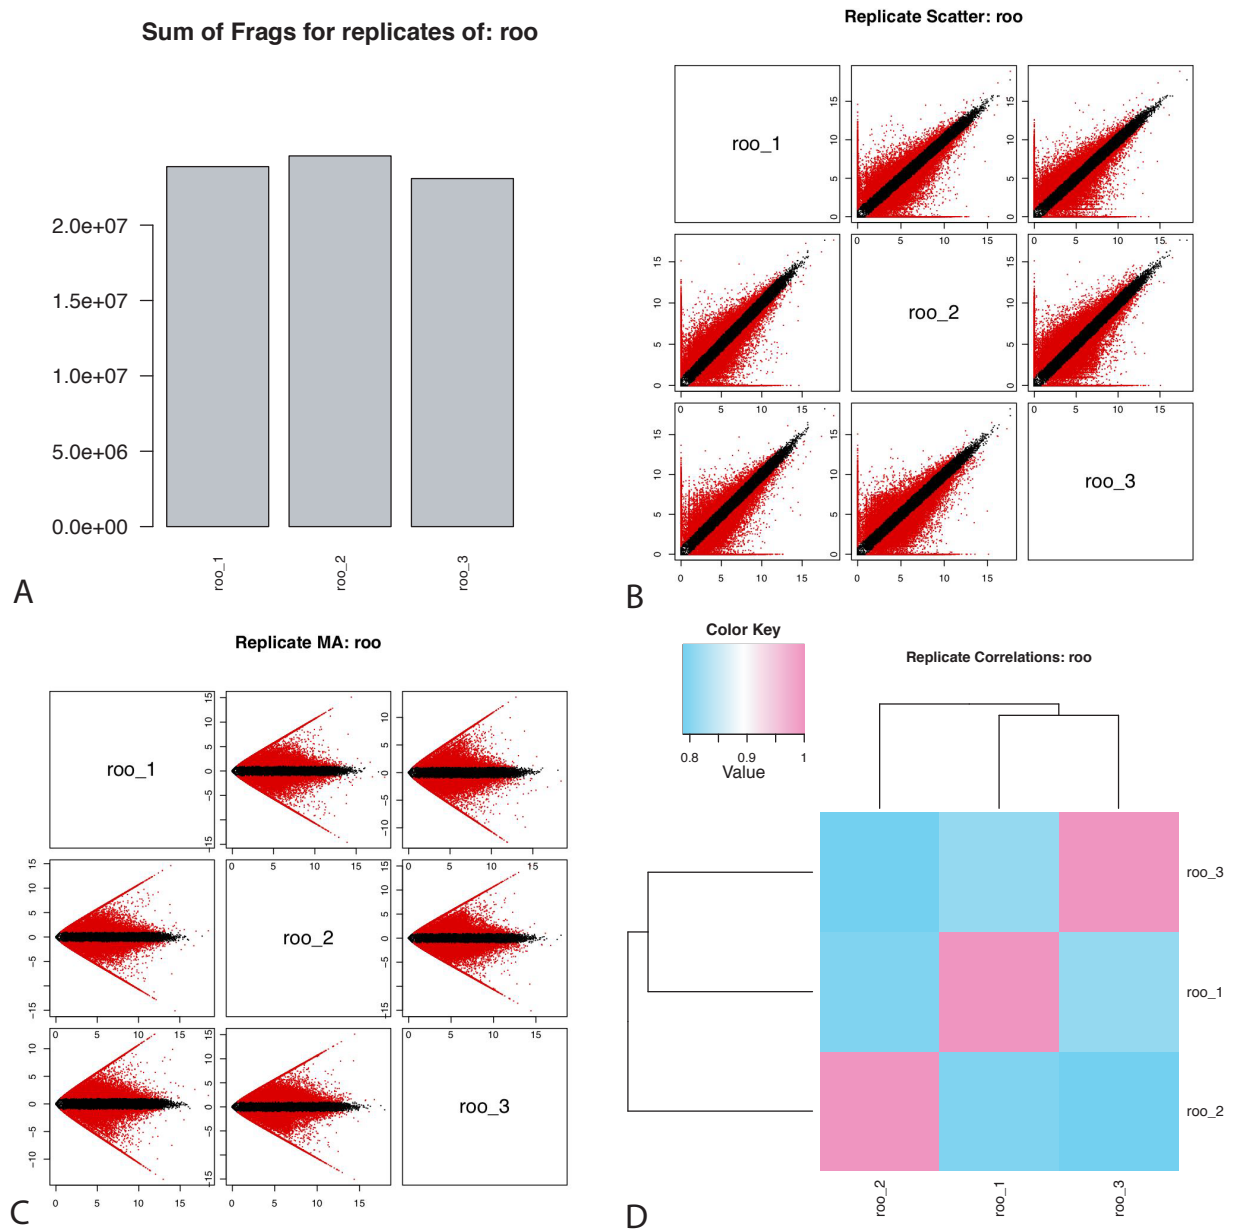

**Fig. S3** Replication information for the three biological replicates of shoot apical meristem

(SAM) showing A) the sum of fragments for each replicate, B) 1:1 scatterplots of transcript abundance for all pairwise comparisons of the replicates, C) MA plots (Bland Altman plot) for all pairwise comparisons of the replicates, and D) the correlation coefficients between all replicates.

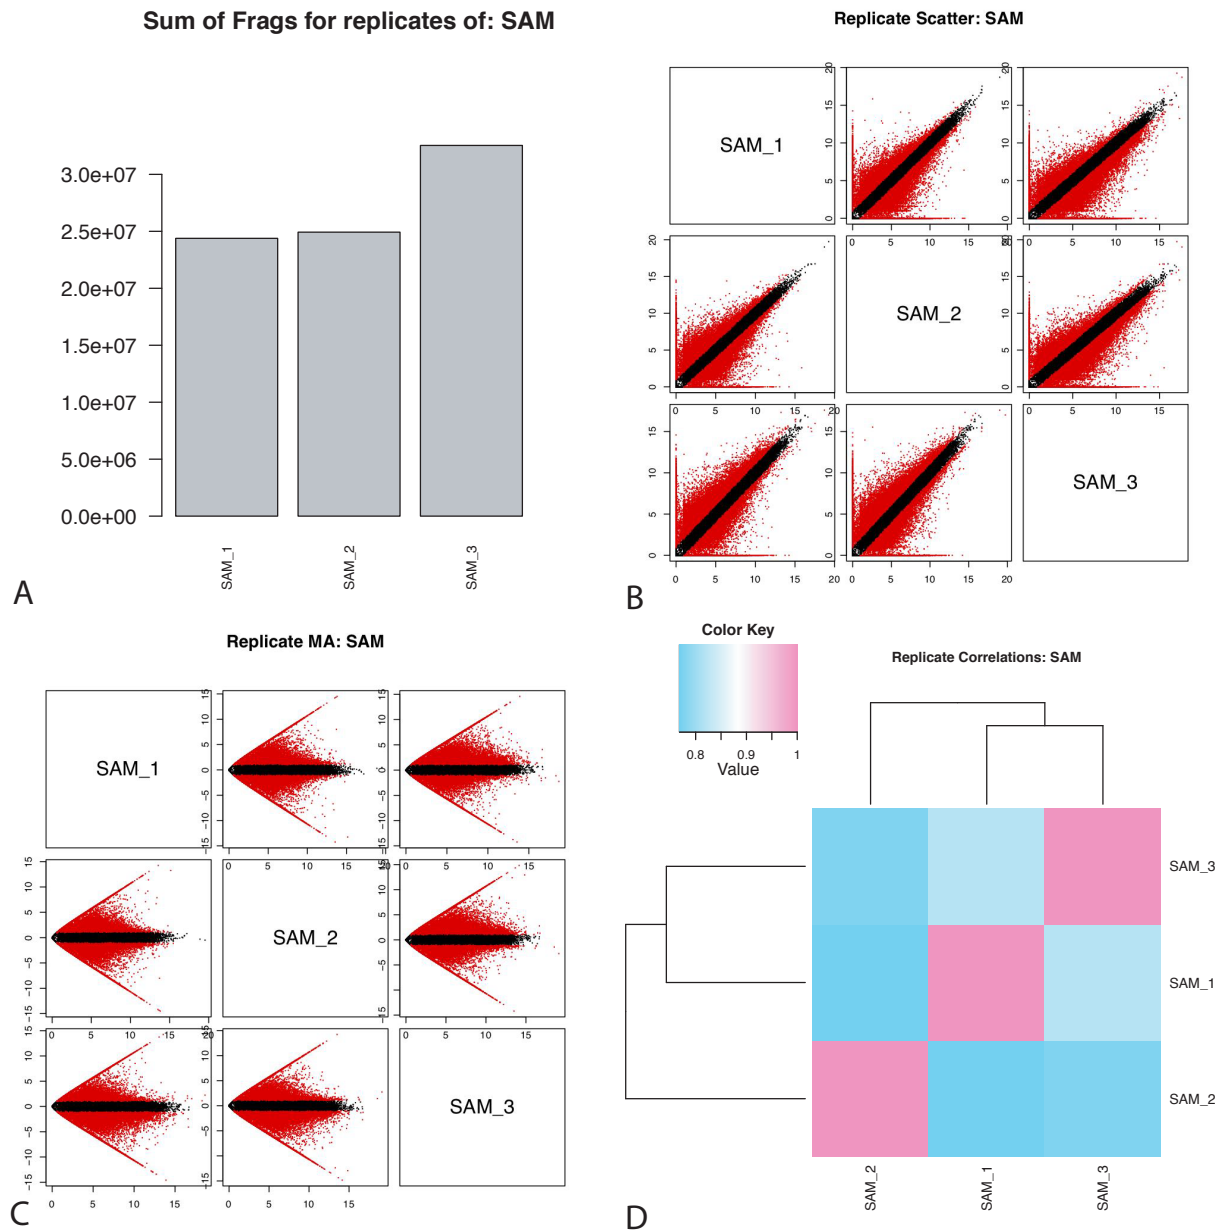

**Fig. S4** Replication information for the three biological replicates of tuber tissue (TUB) showing A) the sum of fragments for each replicate, B) 1:1 scatterplots of transcript abundance for all

pairwise comparisons of the replicates, C) MA plots (Bland Altman plot) for all pairwise comparisons of the replicates, and D) the correlation coefficients between all replicates.

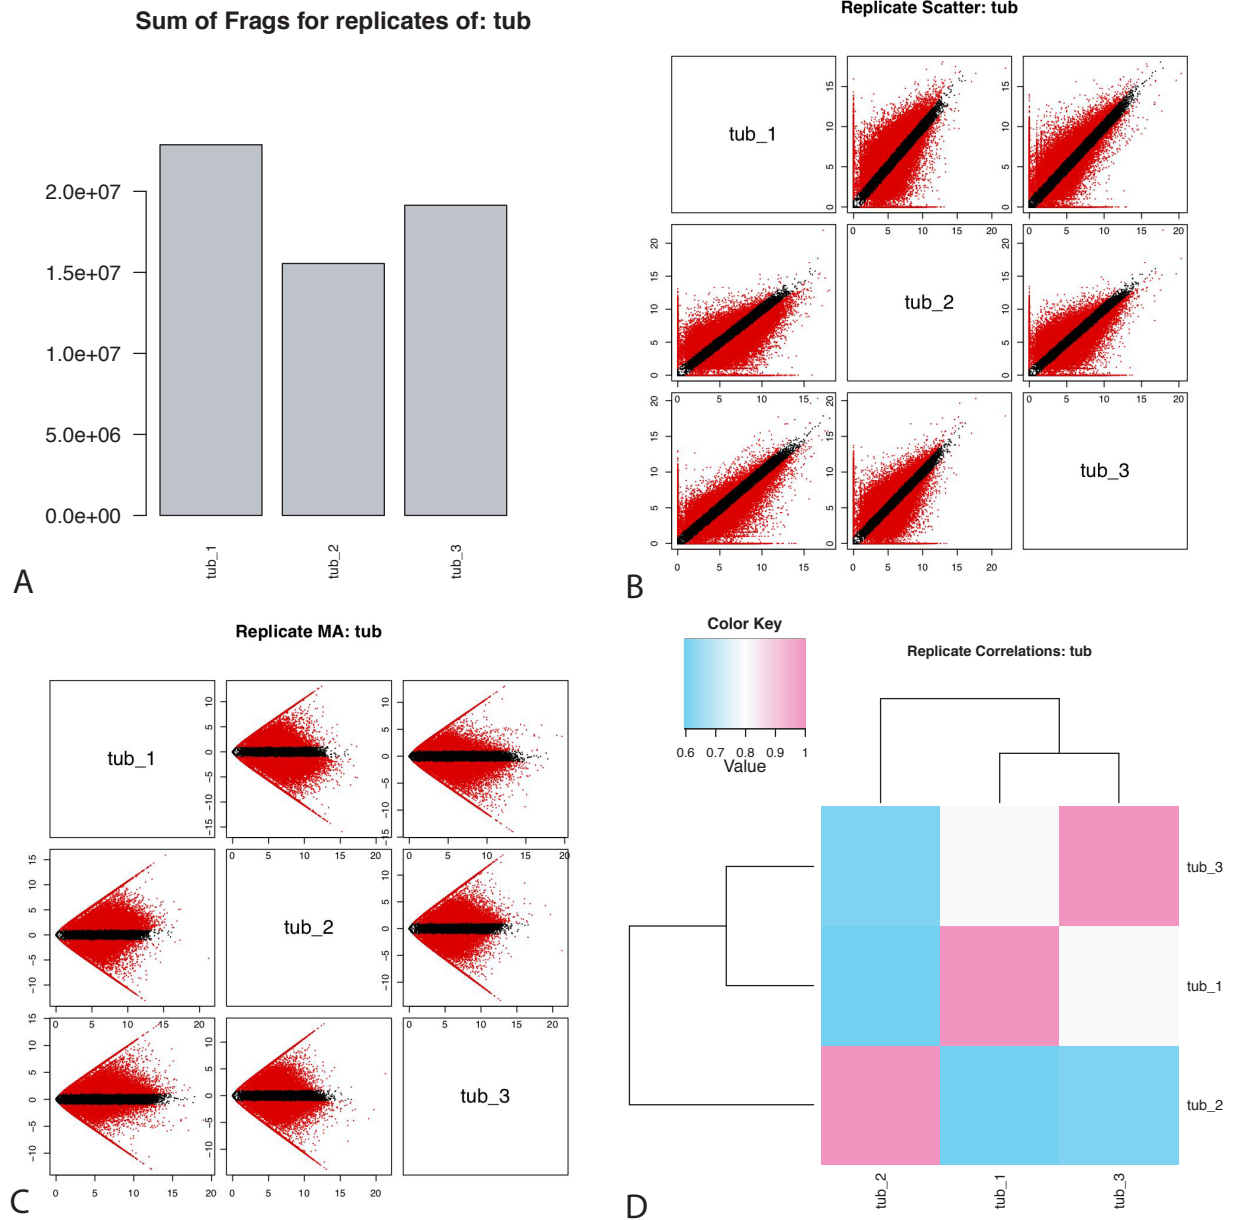

**Table S1** Search terms used to identify isoforms in candidate gene groups. We queried the annotated transcriptome using R's `grep()` function to identify the isoforms and then checked their expression levels in the RSEM data using `deseq2`.

| Gene Group    | Search Term                      | Search Column        | No. Isoforms |
|---------------|----------------------------------|----------------------|--------------|
| Starch        | GO:0019252                       | gene_ontology_blast  | 168          |
| Cytokinin     | GO:0009735                       | gene_ontology_blast  | 356          |
| Abscisic Acid | GO:0009737                       | gene_ontology_blast  | 1357         |
| Auxin         | GO:0009733                       | gene_ontology_blast  | 716          |
| MADS-Box      | MADS-box                         | sprot_Top_BLASTX_hit | 116          |
| KNOX          | KNOX                             | Pfam                 | 18           |
| Gibberellin   | GO:0009739                       | gene_ontology_blast  | 295          |
| Expansins     | Expansin                         | sprot_Top_BLASTX_hit | 117          |
| Lignin        | GO:0009809                       | gene_ontology_blast  | 325          |
| 14-3-3 genes  | 14-3-3-like protein              | sprot_Top_BLASTX_hit | 62           |
| CDPK          | Calcium-dependent protein kinase | sprot_Top_BLASTX_hit | 180          |

**Table S2** To identify the expression levels of isoforms corresponding to specific candidate genes, we blasted amino acid sequences of the specific candidate gene to a blast-database of the assembled transcriptome.

| Candidate Gene    | Source  | Accession Number       | Taxon                       |
|-------------------|---------|------------------------|-----------------------------|
| FT-like           | GenBank | AGZ20207.1             | <i>Allium cepa</i>          |
| FT-like           | GenBank | AGZ20210.1             | <i>Allium cepa</i>          |
| FT-like           | SPROT   | tr M1C558 M1C558_SOLTU | <i>Solanum tuberosum</i>    |
| Sulfite reductase | GenBank | AAC24584.1             | <i>Prunus armeniaca</i>     |
| WOX4              | SPROT   | sp Q6X7J9 WOX4_ARATH   | <i>Arabidopsis thaliana</i> |
| OsbHLH120         | SPROT   | tr Q67TR8 Q67TR8_ORYSJ | <i>Oryza sativa</i>         |
| IDD5              | SPROT   | sp Q9ZUL3 IDD5_ARATH   | <i>Arabidopsis thaliana</i> |

**Table S3** All 271 differentially expressed isoforms, including their full annotation information and differential expression data (see attached excel spreadsheet).
